# Supplementary material
Source: Royal Society of Chemistry journal article supplement (doi:10.1039/d6ta01486k)
Supplement: d6ta01486k1.pdf [file d6ta01486k1.pdf]

1  
2  
3  
4  
5  
6  
7  
8  
9  
10  
11  
12  
13  
14  
15  
16  
17  
18  
19  
20  
21  
22  
23

**Supplementary Information**

**Benefits and Yields of Simultaneous HClO and H<sub>2</sub> Generation in Side-Emitting Optical  
Fiber Photocatalytic Reactors**

Han Fu, Ethan Sheard, Jirapat Ananpattarachai, Daisuke Ioka, Zhenhua Pan, Paul Westerhoff

<sup>[1]</sup> School of Sustainable Engineering and the Built Environment, Ira A. Fulton Schools of  
Engineering, Arizona State University, Tempe, AZ 85287-3005, USA

<sup>[2]</sup> Department of Applied Chemistry, Graduate School of Engineering, University of Hyogo,  
Himeji, Hyogo 671-2280, Japan

\*Corresponding author: Paul Westerhoff

Email: [p.westerhoff@asu.edu](mailto:p.westerhoff@asu.edu)

## 24 **Section S1. Synthesis of RhCrCoO<sub>x</sub>-deposited SrTiO<sub>3</sub>:Al (STO)**

25           Based on the previous studies <sup>1,2</sup>, Al-doped strontium titanate (SrTiO<sub>3</sub>:Al) was synthesized  
26 using a SrCl<sub>2</sub> flux-assisted solid-state method following a previously reported procedure. SrCl<sub>2</sub>  
27 (Kanto Chemicals Co., Inc., 98.0%, anhydrous), Al<sub>2</sub>O<sub>3</sub> nanopowder (Sigma-Aldrich), and SrTiO<sub>3</sub>  
28 powder (Wako Pure Chemicals Industries, Ltd., 99.9%) were mixed at a molar ratio of 10:0.02:1  
29 and homogenized by grinding in an agate mortar. The mixture was transferred to an alumina  
30 crucible and annealed at 1423 K for 10 h in air, followed by natural cooling to room temperature.  
31 After calcination, the solid product was repeatedly washed with distilled water to remove residual  
32 SrCl<sub>2</sub>. Washing and filtration continued until the supernatant reached neutral pH. The recovered  
33 SrTiO<sub>3</sub>:Al powder was then dried in an oven at 313 K.

34           RhCrCoO<sub>x</sub> cocatalysts were deposited onto SrTiO<sub>3</sub>:Al by an impregnation method using  
35 aqueous precursor solutions. RhCl<sub>3</sub>·6H<sub>2</sub>O (Wako Pure Chemical Industries), K<sub>2</sub>CrO<sub>4</sub> (Kanto  
36 Chemical Co.), and Co(NO<sub>3</sub>)<sub>2</sub>·6H<sub>2</sub>O (Kanto Chemical Co.) were used as Rh, Cr, and Co sources,  
37 respectively. For each batch, 0.4 g of SrTiO<sub>3</sub>:Al was dispersed in 2 mL of distilled water under  
38 sonication and magnetic stirring. Freshly prepared precursor solutions were then added to achieve  
39 nominal loadings of 0.1 wt% each of Rh, Cr, and Co relative to the mass of SrTiO<sub>3</sub>:Al. The  
40 suspension was stirred and evaporated to dryness in a water bath. The resulting powder was  
41 collected and calcined in air at 350 °C for 1 h with a heating rate of 10 °C min<sup>-1</sup> to obtain  
42 RhCrCoO<sub>x</sub>/SrTiO<sub>3</sub>:Al.

43

## 44 **Section S2. Fabrication and characterization of POF-STO**

45           POF-STO samples were fabricated following the procedure illustrated in **Figure S1**, based  
46 on our previous studies <sup>2</sup>. Commercial polymer optical fibers (POFs, 3 mm diameter) consisting

47 of a PMMA core and fluorinated polymer cladding were obtained from Industrial Fiber Optics Inc.  
48 (Model Eaka™ CK-120). Fibers were cut into 16 cm lengths and cleaned with isopropanol (>99%,  
49 Sigma-Aldrich) prior to surface treatment.

50 In Step 1, POF surface etching was conducted to enhance side-emission and increase  
51 surface roughness for STO deposition. Cleaned POFs were immersed in dimethylformamide  
52 (99.8%, Sigma-Aldrich) for 2 s, immediately withdrawn, and dried at room temperature. This  
53 etching cycle was repeated four times. In Step 2, both ends of each etched POF were polished  
54 sequentially using five grades of optical polishing paper (LE30D, LE5P, LE3P, LE1P, and LE03P,  
55 Thorlabs™) until a smooth, mirror-like finish was achieved.

56 In Step 3, an STO suspension was prepared by dispersing STO powder, colloidal silica  
57 binder (Nissan Chemical Inc., ST-OUP), and calcium chloride (VWR, Catalog No. 0556) in 50 mL  
58 of ethanol (Pure 200 proof, anhydrous,  $\geq 99.5$ , Sigma-Aldrich) at a mass ratio of 4.0:1.0:0.046.  
59 The STO concentration was fixed at 5 mg mL<sup>-1</sup>. The suspension was sonicated in a water bath  
60 sonicator (Branson M5800) for 30 min to ensure homogeneous dispersion (Step 4).

61 In Step 5, spray coating was performed by vertically mounting five etched and polished  
62 POFs on a rotating platform. A drying fan positioned to the right of the platform maintained a local  
63 temperature of 65–70 °C. The STO suspension was sprayed from the left side using a manual  
64 airbrush sprayer (Gocheer™ Airbrush Kit, Model 101-BMC). The total sprayed volume was varied  
65 between 10 and 50 mL to control catalyst loading. In Step 6, the coated fibers were dried at 90 °C  
66 for 4 h. After drying, the POF-STO samples were rinsed with isopropanol to remove loosely  
67 attached STO particles and dried again at 60 °C for 1 h prior to use.

68

69

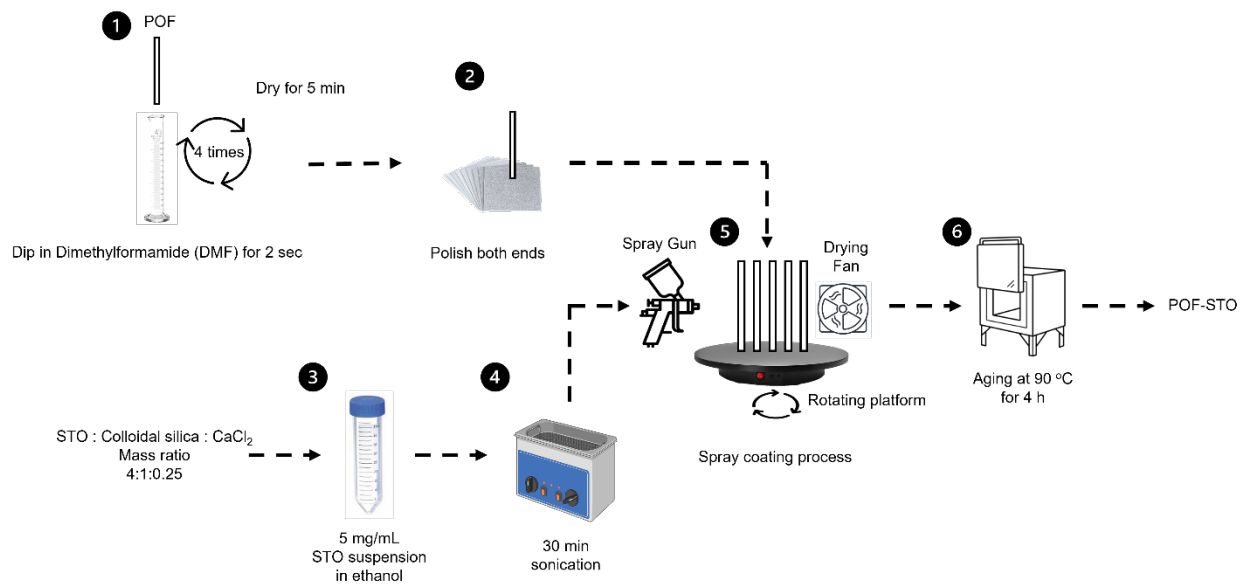

70

71 **Figure S1.** Synthesis pathway of POF-STO

72

73

74

75

76

77

78

79

80

81

82

83

84

85

86 **Section 3 Estimation of the total side-emitted power ( $P_s$ )**

87 Optical properties were evaluated by measuring photon irradiance, including the total light input  
88 at the proximal end ( $I_0$ ), side-emitted light intensity ( $I_s$ ) per 0.4 cm fiber length, and transmitted  
89 light intensity at the distal end ( $I_T$ ). Light irradiance ( $\mu\text{W cm}^{-2}$ ) was measured using a  
90 spectroradiometer (Avantes AvaSpec-2048 L), as shown in **Figure S2a**. Furthermore, **Figure S2b**  
91 shows the total light input ( $I_0$ ,  $\mu\text{W cm}^{-2}$ ) at the proximal end of the fiber entering the POF can be  
92 represented according to the following formula<sup>2-4</sup>:

93 
$$I_0 = I_{\text{Abs}} + I_s + I_U + I_T \quad (\text{S1})$$

94 where  $I_{\text{Abs}}$  is light irradiance absorbed by bare POF materials,  $I_s$  is the side-emitted light,  $I_U$  is the  
95 light irradiance absorbed and utilized by the STO within the POF cladding, and  $I_T$  is the transmitted  
96 light irradiance from the distal end of the POF.

97 The total side-emitted power ( $P_s$ ) was calculated by integrating the local side-emission  
98 irradiance ( $I_{s,x}$ ) measured at 0.4 cm intervals along the active fiber length ( $L = 16$  cm). As detailed  
99 in the calculation model (**Figure S2c**), the integration is defined as<sup>3,4</sup>:

100 
$$P_s (\mu\text{W}) = I_s (\mu\text{W cm}^{-2}) \times \text{lateral surface area (cm}^2) = 2 \pi r \times \int_{x=0}^{x=16 \text{ cm}} I_{s,x} dx \quad (\text{S2})$$

101 where  $r$  is the fiber radius (0.15 cm) and  $I_{s,x}$  is the measured local irradiance at position  $x$  (each  
102 0.45 cm). The reactor was operated using a UV-LED source driven at three distinct electrical power  
103 levels: 3 W, 5 W, and 10 W. By applying Equation S2 to the measured irradiance profiles, the  
104 effective  $P_s$  values were determined to be **0.27 W, 0.45 W, and 0.90 W**, respectively.

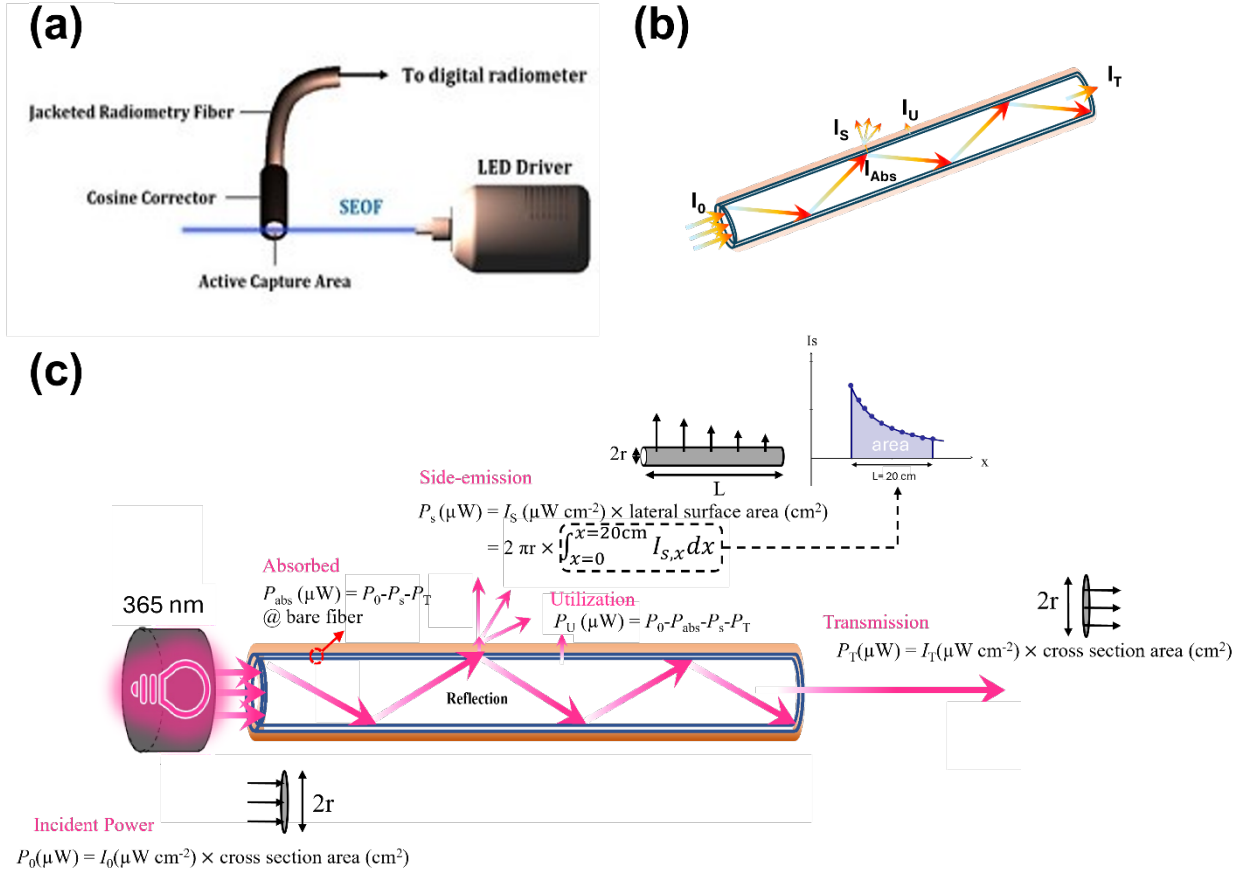

105

106 **Figure S2.** Schematic of the optical characterization setup and photon energy balance analysis. (a)

107 Experimental setup showing the spectroradiometer coupled to a cosine corrector for measuring

108 local irradiance. (b) Conceptual illustration of light propagation modes within the POF-STO

109 composite, identifying input ( $I_0$ ), side-emission ( $I_s$ ), utilization ( $I_U$ ), and transmission ( $I_T$ ). (c)

110 Detailed photon power balance model defining the calculation of Side-Emitted Power ( $P_s$ ) via

111 Equation S2, integrating the measured irradiance over the lateral surface area of the fiber.

112

113

114

115

116

117 **Section S4. Calculation of Stoichiometric Charge Balance**

118  
119 To verify that the fundamental principle of charge neutrality is strictly maintained during the  
120 simultaneous co-generation process, the stoichiometric balance between photogenerated electrons  
121 ( $e^-$ ) and holes ( $h^+$ ) was quantified for all experimental trials. The overall photocatalytic process  
122 relies on one reduction half-reaction and two competing oxidation half-reactions. The reduction of  
123 protons to drive  $H_2$  evolution consumes two electrons per molecule of  $H_2$  generated. Concurrently,  
124 the photogenerated holes are consumed by two parallel pathways: the selective oxidation of  
125 chloride to produce  $HClO$ , which requires two holes per molecule, and the competing oxidation of  
126 water to evolve  $O_2$ , which requires four holes per molecule.

127 
$$2 \times R_{H_2}(\text{electrons}) = 2 \times R_{HClO}(\text{holes}) + 4 \times R_{O_2}(\text{holes}) \quad (S3)$$

128 To evaluate the macroscopic charge neutrality of the system, the total molar consumption rate of  
129 holes was compared directly against the total molar consumption rate of electrons. The measured  
130 generation rates of the three primary products  $H_2$ ,  $HClO$ , and  $O_2$ , were utilized to calculate this  
131 ratio. To ensure unit consistency, the measured aqueous free chlorine generation rate was first  
132 converted into a molar rate  $\mu\text{mol h}^{-1}$ , using the established reactor volume. The experimental  
133 charge balance percentage was subsequently calculated using the following equation:

134 
$$\text{Charge Balance (\%)} = \frac{2 \times n(HClO) + 4 \times n(O_2)}{2 \times n(H_2)} \times 100 \quad (S4)$$

135 In this equation,  $n$  represents the measured molar generation rate of each respective product. An  
136 ideal closed system exhibiting perfect charge utilization without intermediate radical accumulation  
137 should yield a charge balance of exactly 100%. The calculated average experimental charge  
138 balance of 97.2% across the design space quantitatively confirms that global charge neutrality is  
139 fundamentally preserved by the complementary water oxidation reaction, even under operational  
140 regimes where the targeted  $HClO$  generation rate is mass-transport limited. The detailed

141 experimental measurements and the resulting charge balance for each of the fifteen design space  
142 trials are provided in Table S1 below.

143

144 **Table S1.** Experimental Data and Charge Balance Deviation across RSM Trials

| <b>Run</b> | <b>Free Chlorine<br/>Rate (<math>\mu\text{mol h}^{-1}</math>)</b> | <b>H<sub>2</sub> Evolution Rate<br/>(<math>\mu\text{mol h}^{-1}</math>)</b> | <b>O<sub>2</sub> Evolution Rate<br/>(<math>\mu\text{mol h}^{-1}</math>)</b> | <b>Charge<br/>Balance (%)</b> |
|------------|-------------------------------------------------------------------|-----------------------------------------------------------------------------|-----------------------------------------------------------------------------|-------------------------------|
| 1          | 0.03                                                              | 42.78                                                                       | 20.31                                                                       | 95.00%                        |
| 2          | 0.08                                                              | 67.22                                                                       | 31.56                                                                       | 94.00%                        |
| 3          | 0.25                                                              | 64.27                                                                       | 29.45                                                                       | 92.00%                        |
| 4          | 0.96                                                              | 50.95                                                                       | 24.25                                                                       | 97.10%                        |
| 5          | 0.14                                                              | 63.84                                                                       | 31.53                                                                       | 99.00%                        |
| 6          | 0.79                                                              | 45.69                                                                       | 22.90                                                                       | 102.00%                       |
| 7          | 0.75                                                              | 64.47                                                                       | 31.03                                                                       | 97.40%                        |
| 8          | 0.77                                                              | 55.68                                                                       | 26.20                                                                       | 95.50%                        |
| 9          | 0.62                                                              | 61.79                                                                       | 30.19                                                                       | 98.70%                        |
| 10         | 0.01                                                              | 61.03                                                                       | 31.55                                                                       | 103.40%                       |
| 11         | 0.09                                                              | 63.04                                                                       | 30.98                                                                       | 98.40%                        |
| 12         | 0.14                                                              | 49.73                                                                       | 23.68                                                                       | 95.50%                        |
| 13         | 0.96                                                              | 52.62                                                                       | 24.98                                                                       | 96.80%                        |
| 14         | 0.00                                                              | 67.67                                                                       | 31.67                                                                       | 93.60%                        |
| 15         | 0.50                                                              | 50.48                                                                       | 24.84                                                                       | 99.40%                        |

145

146

147

148

149

150

151

152

153

154

155 **Section S5 Apparent Quantum Yield (AQY) Calculation**

156 The Apparent Quantum Yield (AQY) for hydrogen evolution was calculated based on the effective  
157 side-emitted photon flux utilizing the following equation:

$$158 \quad AQY(\%) = \frac{2 \times \text{Number of evolved } H_2 \text{ molecules}}{\text{Number of incident photons}} \times 100 \quad (S5)$$

159 To determine the incident photon flux (number of photons per second), the total side-emitted  
160 optical power ( $P_s$ , measured in J/s or Watts) was divided by the energy of a single photon ( $E_p$ ). The  
161 energy of a single photon at the excitation wavelength ( $\lambda$ ) was calculated using the Planck-Einstein  
162 relation:

$$163 \quad E_p = \frac{hc}{\lambda} \quad (S6)$$

164 where  $h$  is Planck's constant,  $c$  is the speed of light in a vacuum, and  $\lambda$  is the excitation wavelength.  
165 Therefore, the total incident photon flux can be expressed as:

$$166 \quad \text{Incident photon flux} = \frac{p_s \times \lambda}{hc} \quad (S7)$$

167 Using the measured side-emitted power inputs (**0.27 W, 0.45 W, and 0.90 W**), the total photon  
168 flux was determined and applied to the AQY equation. The calculated AQY for all 15 experimental  
169 runs is summarized in Table S2.

170

171 **Section S6. Turnover Frequency (TOF) Calculation**

172 The Turnover Frequency (TOF) evaluates the intrinsic catalytic activity of the loaded cocatalysts  
173 by normalizing the product generation rate against the exact number of available active metal sites.

174 In this POF-STO system, the RhCrCoOx cocatalyst features a distinct structural mechanism. The  
175 Rhodium (Rh) core serves as the primary active site for the reduction half-reaction ( $H_2$  evolution).

176 The Chromium Oxide ( $CrO_x$ ) forms a selectively permeable protective shell and does not act as  
177 the primary catalytic center. Instead, the Cobalt Oxyhydroxide ( $CoOOH$ ) layer acts as the active

178 hole scavenger, driving the oxidation half-reaction (HClO generation and competitive OER) while  
179 protecting the structure from oxidative corrosion.

180 Consequently, the TOF for H<sub>2</sub> evolution was normalized against the available Rhodium  
181 sites, while the TOF for HClO generation was normalized against the available Cobalt sites.  
182 Assuming a 0.1 wt% loading for both active metals, the moles of active Rh sites ( $n_{Rh}$ ) and Co  
183 sites ( $n_{Co}$ ) were calculated using their respective atomic weights ( $M_{Rh} = 102.9 \text{ g mol}^{-1}$ ,  $M_{Co} =$   
184  $58.93 \text{ g mol}^{-1}$ ) and the total mass of the loaded STO catalyst;

$$185 \quad n_{Rh} = \frac{m_{STO} \times 0.001}{102.9} \quad (S8)$$

$$186 \quad n_{Co} = \frac{m_{STO} \times 0.001}{58.93} \quad (S9)$$

187 The TOF (expressed in h<sup>-1</sup>) for the target reduction and oxidation reactions was then calculated  
188 by dividing the experimental molar generation rate of each product by the moles of its  
189 corresponding active metal site:

$$190 \quad TOF_{H_2} = \frac{n(H_2)}{n_{Rh}} \quad (S10)$$

$$191 \quad TOF_{HClO} = \frac{n(HClO)}{n_{Co}} \quad (S11)$$

192 These site-specific calculations allow for the direct evaluation of the kinetic efficiency of the  
193 individual reduction and oxidation half-reactions based on their true mechanistic active sites,  
194 independently of the total catalyst mass. All the calculated values were summarized in **Table S2**.

195

196

197

198

199

200 **Table S2** Estimated Apparent Quantum Yield (AQY) and Turnover Frequency (TOF) for the 15-  
 201 run experimental matrix.  
 202

| Run | Normalized<br>H <sub>2</sub> Rate<br>(mmol g <sup>-1</sup> h <sup>-1</sup> ) | Normalized<br>HClO Rate<br>(mmol g <sup>-1</sup> h <sup>-1</sup> ) | AQY<br>H <sub>2</sub> (%) | TOF<br>H <sub>2</sub> (h <sup>-1</sup> ) | TOF<br>HClO (h <sup>-1</sup> ) |
|-----|------------------------------------------------------------------------------|--------------------------------------------------------------------|---------------------------|------------------------------------------|--------------------------------|
| 1   | 13.44                                                                        | 0.00                                                               | 1.73                      | 587.00                                   | 0.20                           |
| 2   | 6.43                                                                         | 0.02                                                               | 4.54                      | 2770.80                                  | 1.60                           |
| 3   | 3.40                                                                         | 0.03                                                               | 1.30                      | 1322.80                                  | 2.60                           |
| 4   | 12.77                                                                        | 0.06                                                               | 3.44                      | 699.20                                   | 6.70                           |
| 5   | 3.05                                                                         | 0.03                                                               | 1.29                      | 2631.70                                  | 2.90                           |
| 6   | 12.89                                                                        | 0.05                                                               | 1.85                      | 627.00                                   | 5.50                           |
| 7   | 5.57                                                                         | 0.15                                                               | 4.35                      | 2657.70                                  | 15.50                          |
| 8   | 6.18                                                                         | 0.08                                                               | 2.25                      | 1145.90                                  | 8.00                           |
| 9   | 6.10                                                                         | 0.06                                                               | 1.25                      | 1271.80                                  | 6.50                           |
| 10  | 12.61                                                                        | 0.00                                                               | 4.12                      | 1256.00                                  | 0.10                           |
| 11  | 3.32                                                                         | 0.02                                                               | 2.55                      | 2598.70                                  | 1.90                           |
| 12  | 3.51                                                                         | 0.01                                                               | 3.36                      | 682.40                                   | 1.00                           |
| 13  | 13.53                                                                        | 0.06                                                               | 1.07                      | 722.10                                   | 6.60                           |
| 14  | 3.37                                                                         | 0.00                                                               | 1.37                      | 2789.40                                  | 0.00                           |
| 15  | 2.85                                                                         | 0.03                                                               | 1.02                      | 692.70                                   | 3.40                           |

203 **Table S3** Benchmark comparison of the POF-STO architecture against state-of-the-art  
 204 photocatalytic systems in saline water<sup>5-10</sup>.  
 205  
 206

| Photocatalyst System                  | Reaction Medium                     | Light Source                      | H <sub>2</sub> Yield (mmol g <sup>-1</sup> h <sup>-1</sup> ) | HClO / Cl <sub>2</sub> Yield               | AQY (%)                | H <sub>2</sub> TOF (h <sup>-1</sup> ) |
|---------------------------------------|-------------------------------------|-----------------------------------|--------------------------------------------------------------|--------------------------------------------|------------------------|---------------------------------------|
| POF-STO (This Work)                   | H <sub>2</sub> & HClO Co-Generation | 365 nm LED                        | 13.5                                                         | 150 umol g <sup>-1</sup> h <sup>-1</sup>   | 4.54 at 365 nm         | 587-2789                              |
| Ir/TiO <sub>2</sub> Heterojunction    | Seawater                            | Full-spectrum light               | 9.8- 46.0                                                    | Not reported                               | 86.5 at 365 nm         | 1163                                  |
| H-TiO <sub>2</sub> /Cu <sub>2</sub> O | Natural Seawater                    | 365 nm light                      | 17.9 to 45.7                                                 | Not reported                               | 14.9 to 18.8 at 365 nm | -                                     |
| 1 wt% Pt/TiO <sub>2</sub>             | 0.5 M NaCl Brine                    | 365 nm LED                        | -                                                            | 70 umol h <sup>-1</sup> (Cl <sub>2</sub> ) | 4.3 at 365 nm          | -                                     |
| BiOCl-N-OV                            | CO <sub>2</sub> -saturated NaCl     | Visible light (300 W Xe, >400 nm) | CO evolved                                                   | 87.2 umol g <sup>-1</sup> h <sup>-1</sup>  | 0.69 at 400 nm         | -                                     |

207

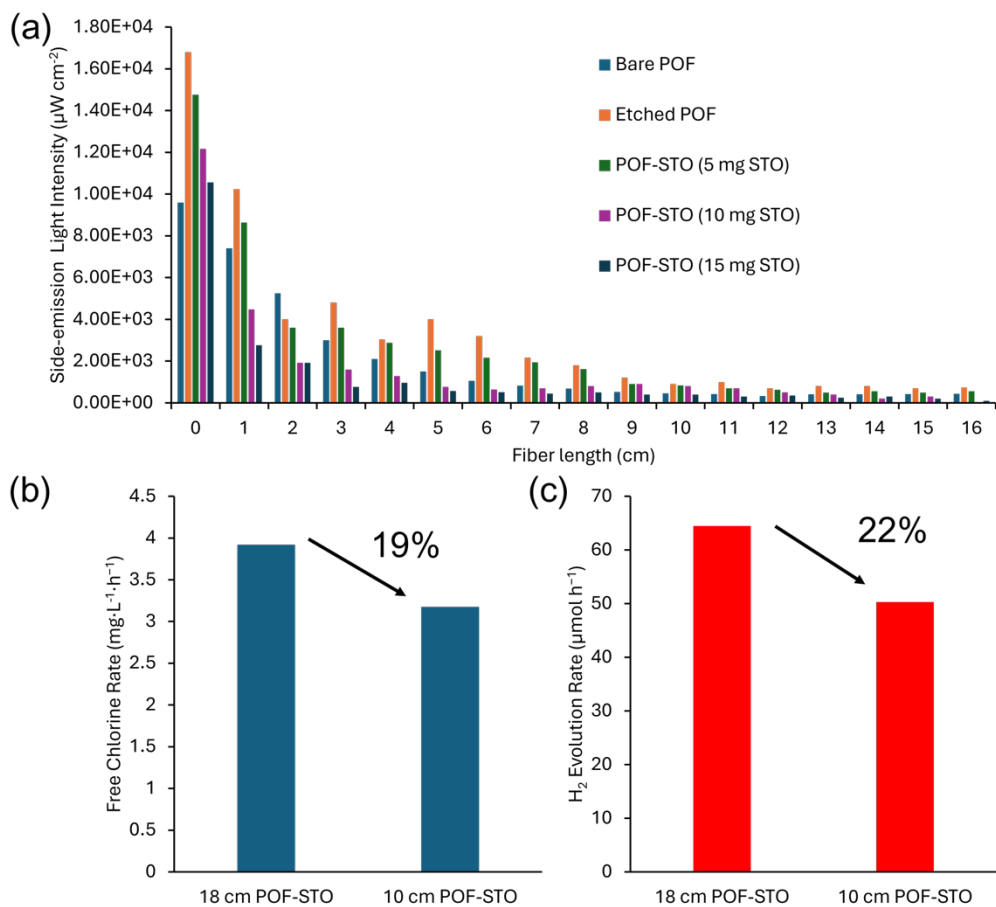

208

209 **Figure S3.** Side-emitting light intensity of the POF-STO. (a) Side-emission intensity along bare,  
 210 etched, and STO-coated fibers. (b) Free chlorine and (c)  $\text{H}_2$  evolution rates comparing 18 cm and  
 211 10 cm POF-STO reactors, demonstrating that most catalytic activity occurs within the first 10 cm.

212

213

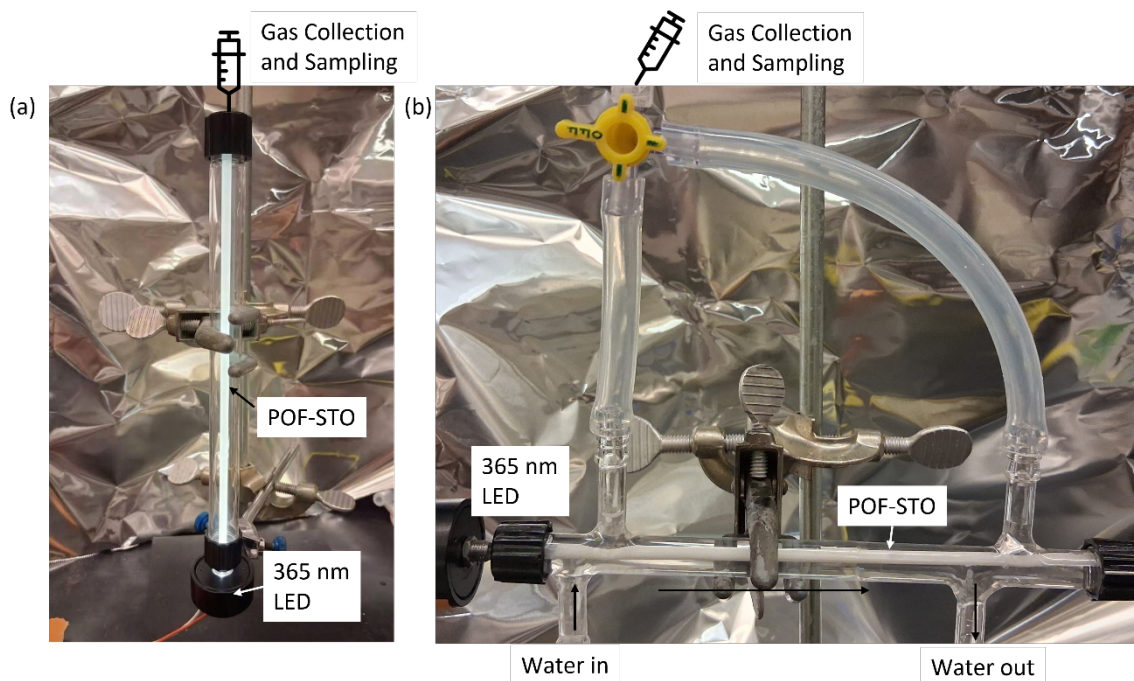

214  
 215 **Figure S4.** the real reactor setup for a) Batch system for RSM optimization, Mode 1 (Shock  
 216 Disinfection), and Mode 3 (Fuel-Priority). (b) continuous flow system for Mode 2 (Maintenance  
 217 Mode).

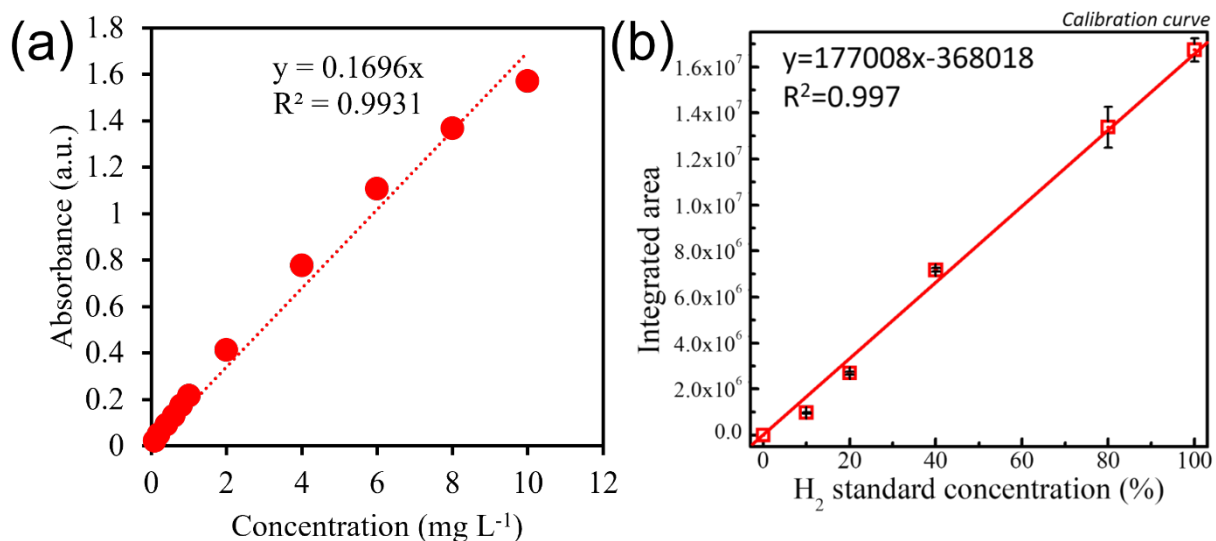

219  
 220 **Figure S5.** Standard calibration curves for quantitative analysis. (a) Calibration plot for aqueous  
 221 free chlorine (HClO) concentration. (b) Calibration plot for hydrogen (H<sub>2</sub>) gas.

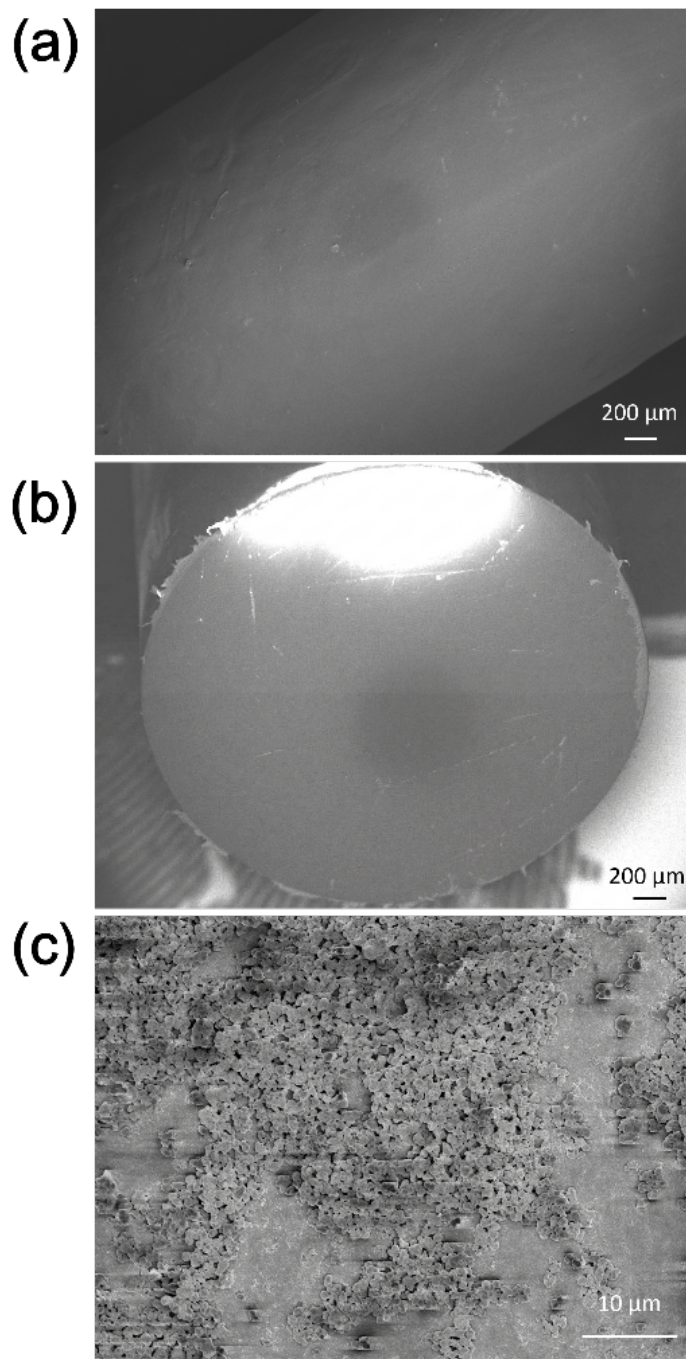

223

224 **Figure S6** Characterization of the POF-STO (10 mg STO loading). (a) Low-magnification lateral  
225 surface of the POF-STO. (b) Cross-section of the POF-STO. (c) High-magnification morphology  
226 of the deposited STO catalyst layer. The SEM images was taken using a Zeiss Auriga FIB-SEM.

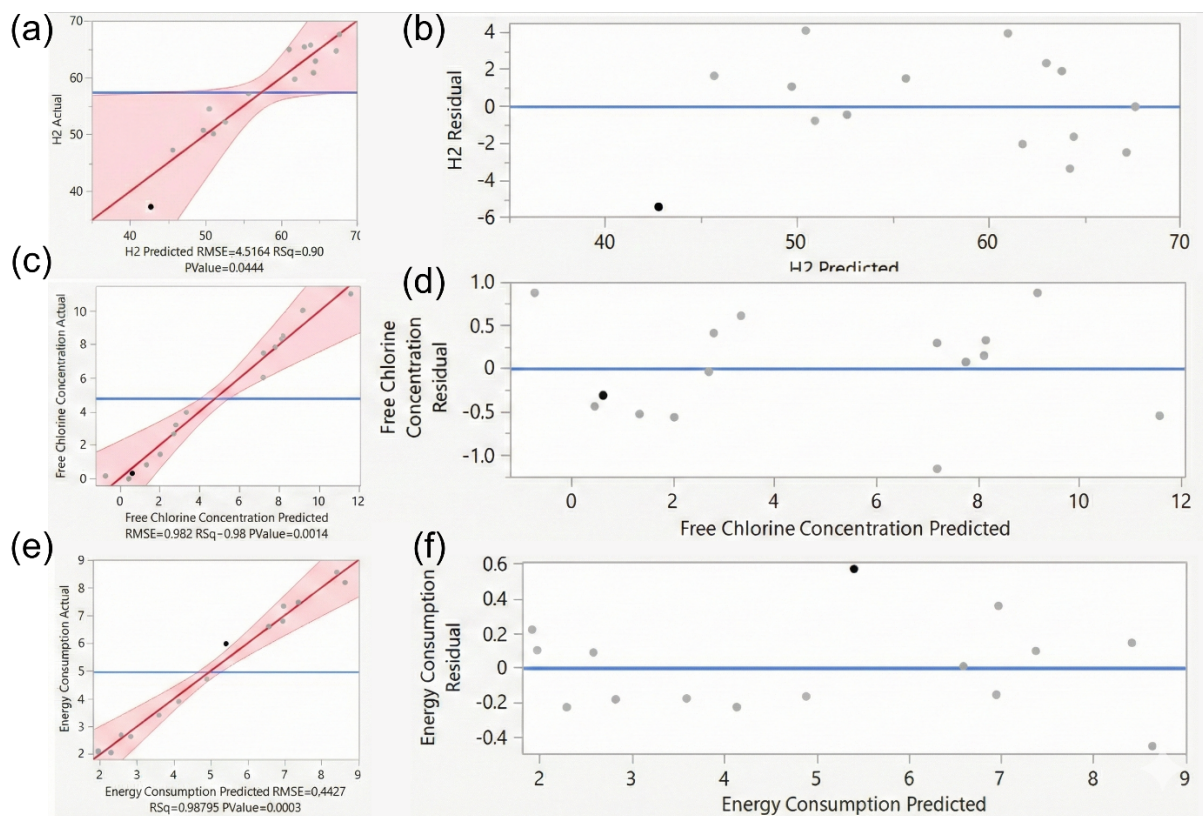

227

228 **Figure S7.** Statistical diagnostic plots for the regression models summarized in Table 2. The left  
 229 column (a, c, e) displays the Actual versus Predicted response values. The right column (b, d, f)  
 230 displays the Residuals versus Predicted response values. (a, b) Hydrogen Evolution Rate. (c, d)  
 231 Aqueous Free Chlorine Concentration. (e, f) Energy Consumption.

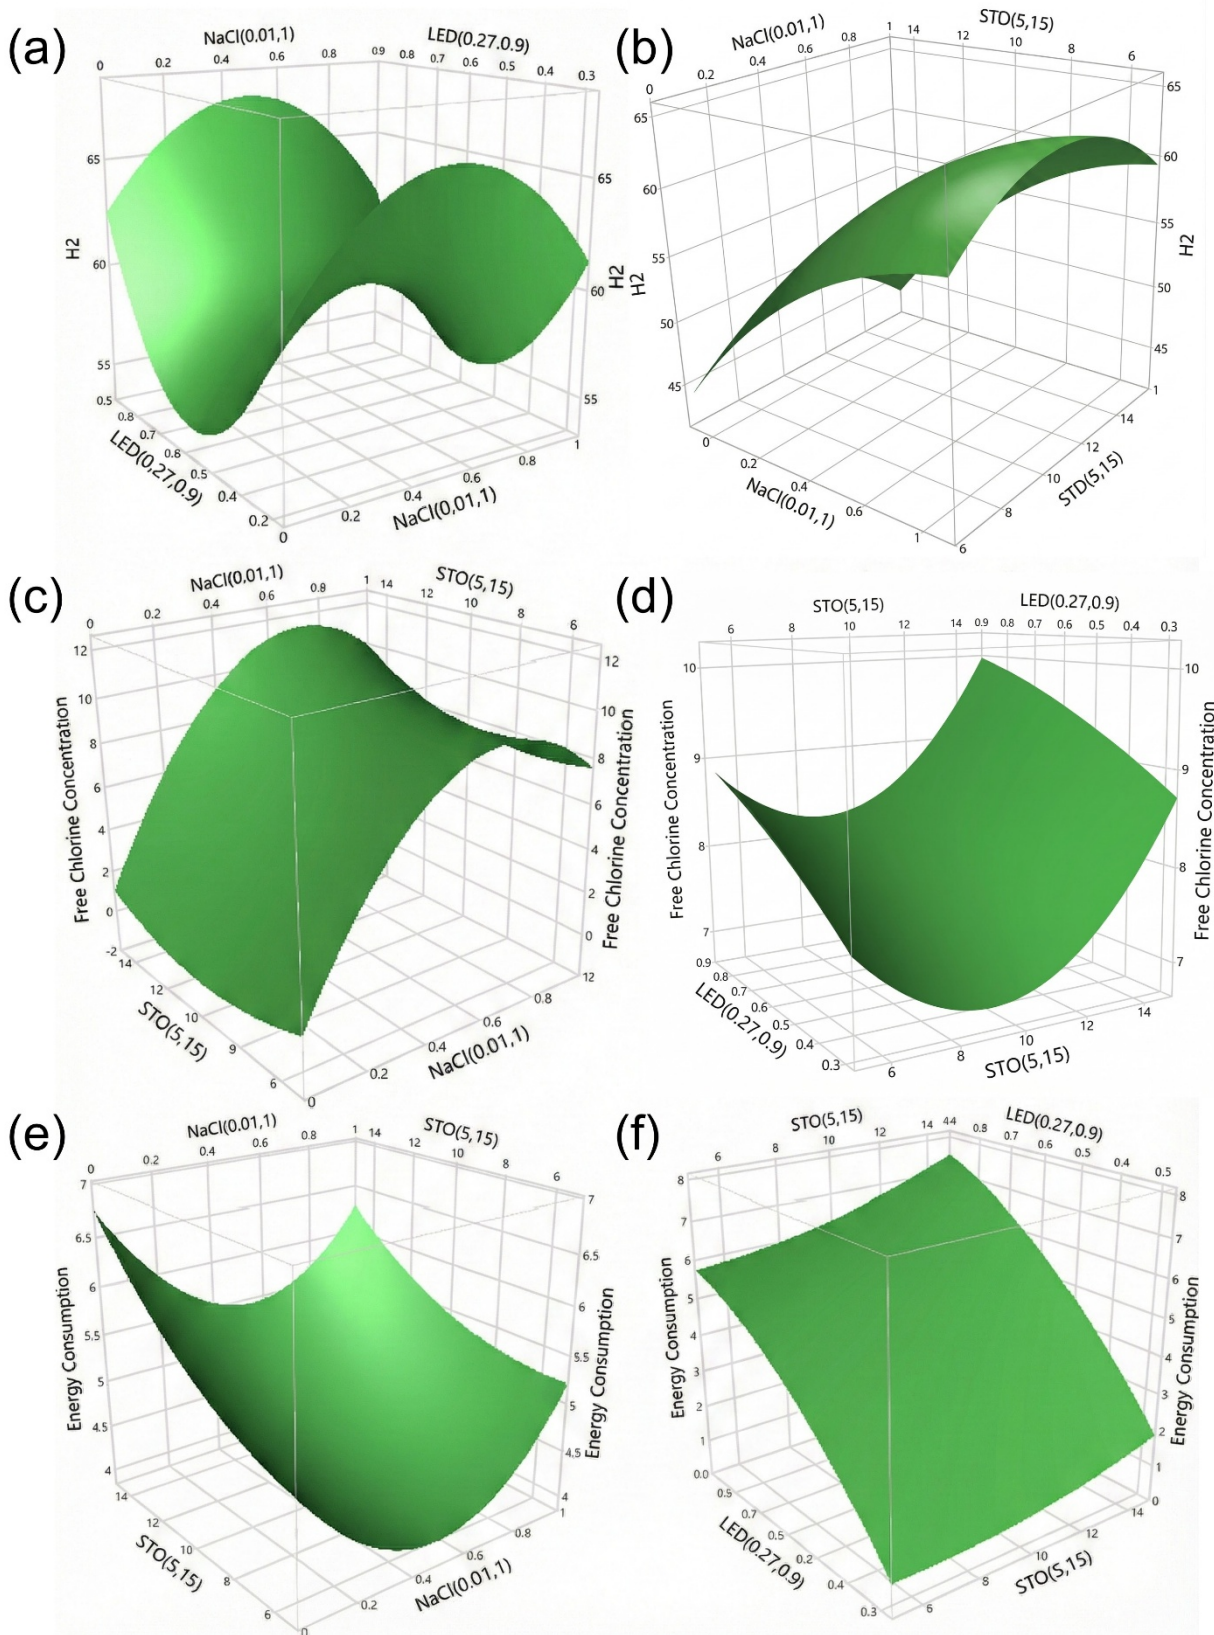

233 **Figure S8.** Comprehensive set of three-dimensional response surface plots mapping the remaining  
234 pairwise interactions in the experimental design space. The vertical axis represents the predicted  
235 response variable, while the base axes represent the two interacting experimental factors. (a)  
236 Hydrogen Evolution Rate as a function of Salinity (NaCl) and Light Intensity (LED). (b) Hydrogen  
237 Evolution Rate as a function of Catalyst Loading (STO) and Light Intensity (LED). (c) Aqueous  
238 Free Chlorine Concentration as a function of Catalyst Loading (STO) and Salinity (NaCl). (d)  
239 Aqueous Free Chlorine Concentration as a function of Salinity (NaCl) and Light Intensity (LED).  
240 (e) Energy Consumption as a function of Catalyst Loading (STO) and Salinity (NaCl). (f) Energy  
241 Consumption as a function of Catalyst Loading (STO) and Light Intensity (LED).

242

243

244

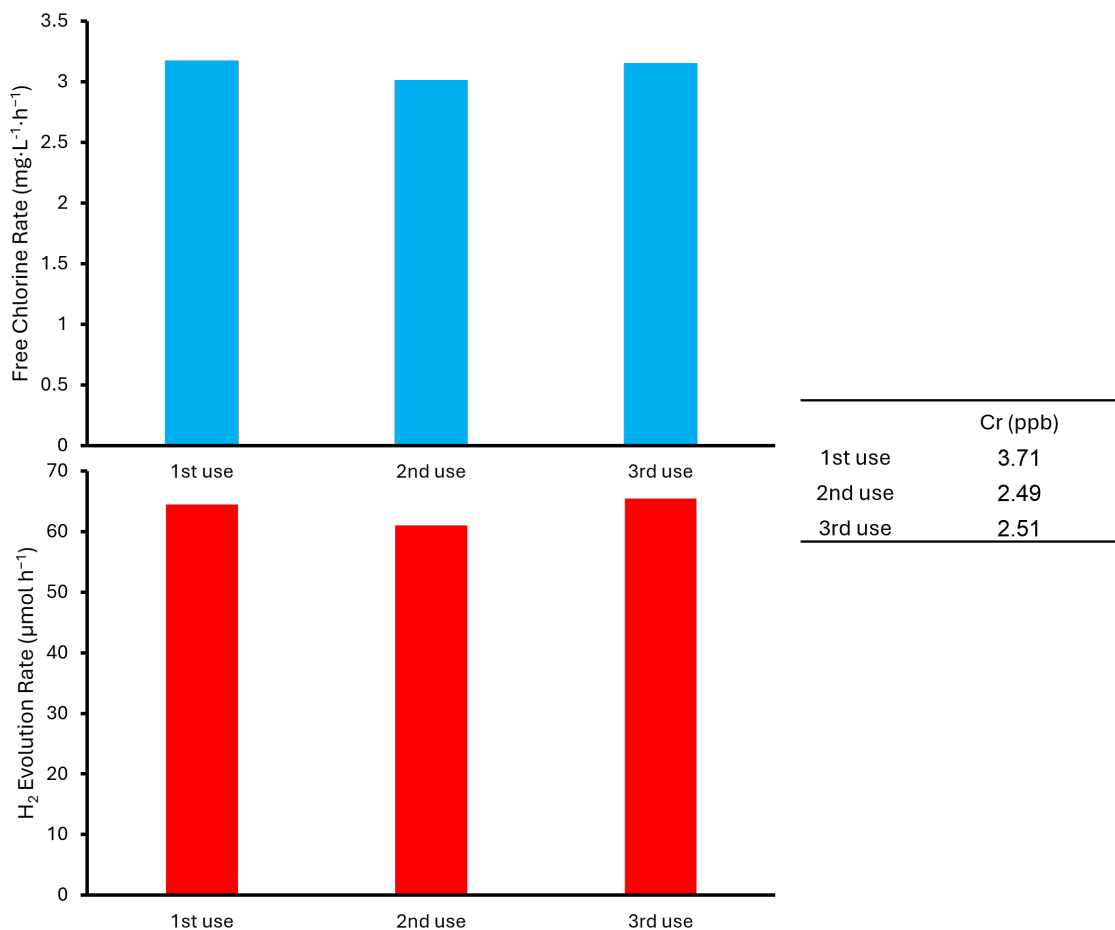

245

246 **Figure S9.** Stability and reusability evaluation of the POF-STO reactor over three consecutive  
 247 cycles. (a) Free chlorine generation rate and (b) H<sub>2</sub> evolution rate demonstrate sustained catalytic  
 248 performance. The accompanying table confirms the chemical stability of the cocatalyst by tracking  
 249 Cr leaching concentrations after each cycle

250

## 251 Reference

252 (1) Nishiyama, H.; Yamada, T.; Nakabayashi, M.; Maehara, Y.; Yamaguchi, M.; Kuromiya, Y.;  
 253 Nagatsuma, Y.; Tokudome, H.; Akiyama, S.; Watanabe, T.; et al. Photocatalytic solar hydrogen  
 254 production from water on a 100-m<sup>2</sup> scale. *Nature* **2021**, *598* (7880), 304-307. DOI:  
 255 [10.1038/s41586-021-03907-3](https://doi.org/10.1038/s41586-021-03907-3).  
 256 (2) Fu, H.; Pan, Z.; Lai, Y.-J. S.; Ananpattarachai, J.; Serpa, M.; Shapiro, N.; Zhao, Z.;  
 257 Westerhoff, P. Green hydrogen production via a photocatalyst-enabled optical fiber system: A  
 258 promising route to net-zero emissions. *Energy and Climate Change* **2025**, *6*, 100175. DOI:  
 259 <https://doi.org/10.1016/j.egycc.2025.100175>.

260 (3) Fu, H.; Ryoma, I.; Lai, Y.-J. S.; Ananpattarachai, J.; Serpa, M.; Shapiro, N.; Zhao, Z.; Pan, Z.;  
261 Westerhoff, P. Bridging Materials Innovation with an Efficient Photocatalyst-Enabled Optical  
262 Fiber Reactor for H<sub>2</sub>O<sub>2</sub> Production. *Environmental Science & Technology* **2025**, *59* (28), 14716-  
263 14727. DOI: 10.1021/acs.est.5c04043.

264 (4) Wang, T.-H.; Lai, Y. S.; Tsai, C.-K.; Fu, H.; Doong, R.-A.; Westerhoff, P.; Rittmann, B. E.  
265 Efficient CO<sub>2</sub> Conversion through a Novel Dual-Fiber Reactor System. *Environmental Science*  
266 *& Technology* **2024**, *58* (31), 13717-13725. DOI: 10.1021/acs.est.3c10274.

267 (5) Wong, C. C. Y.; Preso, D. B.; Qin, Y.; Sinhmar, P. S.; Zong, Z.; Kwan, J. Ultrasound-driven  
268 seawater splitting catalysed by TiO<sub>2</sub> for hydrogen production. *International Journal of Hydrogen*  
269 *Energy* **2025**, *111*, 723-734. DOI: <https://doi.org/10.1016/j.ijhydene.2025.02.327>.

270 (6) Jiang, Y.; Qi, Z.; Yang, W.; Zhang, Y.; Feng, X.; Yang, P.; Qin, P.; Huang, F. Ir/TiO<sub>2</sub>  
271 Heterojunctions with in Situ Defects and Surface Plasmon Resonance: Chloride-Resistant  
272 Catalyst for the Photocatalytic Hydrogen Evolution from Seawater. *Angewandte Chemie*  
273 *International Edition* **2026**, *65* (3), e19008. DOI: <https://doi.org/10.1002/anie.202519008>  
274 (accessed 2026/04/10).

275 (7) Adnan, R. H.; Ng, Y. H. Clean production of chlorine (Cl<sub>2</sub>) and hypochlorous acid (HOCl)  
276 from photocatalytic and photoelectrochemical seawater splitting. *Materials Horizons* **2026**,  
277 10.1039/D5MH01556A. DOI: 10.1039/D5MH01556A.

278 (8) Xiao, S.-T.; Wu, S.-M.; Wu, L.; Dong, Y.; Liu, J.-W.; Wang, L.-Y.; Chen, X.-Y.; Wang, Y.-T.;  
279 Tian, G.; Chang, G.-G.; et al. Confined Heterojunction in Hollow-Structured TiO<sub>2</sub> and Its  
280 Directed Effect in Photodriven Seawater Splitting. *ACS Nano* **2023**, *17* (18), 18217-18226. DOI:  
281 10.1021/acsnano.3c05174.

282 (9) Okada, T.; Kodera, M.; Miseki, Y.; Kusama, H.; Gunji, T.; Sayama, K. Simultaneous  
283 production of hydrogen and chlorine through overall brine splitting with a particulate  
284 photocatalyst. *Chemical Communications* **2024**, *60* (24), 3299-3302, 10.1039/D4CC00136B.  
285 DOI: 10.1039/D4CC00136B.

286 (10) Shi, Y.; Shou, H.; Li, H.; Zhan, G.; Liu, X.; Yang, Z.; Mao, C.; Cheng, J.; Zhang, X.; Jiang,  
287 Y.; et al. Visible Light-Driven Conversion of Carbon-Sequestered Seawater into Stoichiometric  
288 CO and HClO with Nitrogen-Doped BiOCl Atomic Layers. *Angewandte Chemie International*  
289 *Edition* **2023**, *62* (24), e202302286. DOI: <https://doi.org/10.1002/anie.202302286> (accessed  
290 2026/04/10).

291
